# Supplementary material for: Reference Gene Validation for RT–qPCR in PBMCs from Asthmatic Patients with or without Obesity
Source: MDPI journal article supplement (doi:10.3390/mps5030035), 2022-04-22
Supplement: s1 [file s1]

## Supplementary Material

### 1 Supplementary Tables

**Table S1. Patients' clinical features.**

|                                  | Healthy   | Asthmatic | Obese asthmatic | p value |
|----------------------------------|-----------|-----------|-----------------|---------|
| N,                               | 3         | 3         | 3               | -       |
| Women, n                         | 2         | 2         | 3               | ns      |
| Age, years                       | 50 ± 14   | 53 ± 16   | 51 ± 2          | ns      |
| BMI, kg/m <sup>2</sup>           | 25.5 ± 3  | 24.9 ± 3  | 47 ± 5          | < 0.001 |
| FEV <sub>1</sub> , %             | 99.3 ± 22 | 88.3 ± 23 | 88.7 ± 9        | ns      |
| FEV <sub>1</sub> (post), %       | 103 ± 23  | 94 ± 17   | 93.3 ± 3        | ns      |
| FEV <sub>1</sub> / FVC, %        | 73 ± 11   | 65.3 ± 8  | 82.7 ± 1        | ns      |
| FEV <sub>1</sub> / FVC (post), % | 75 ± 9    | 71.7 ± 4  | 85.7 ± 1        | ns      |
| FeNO, ppb                        | 35.7 ± 20 | 54.7 ± 18 | 23.3 ± 14       | ns      |
| 25-OH VitD, ng/ml                | 24 ± 12   | 24 ± 4    | 15 ± 8          | ns      |

Data expressed as mean ± SD. BMI: body mass index; FEV<sub>1</sub>: forced expiratory volume in 1 second; FVC: forced vital capacity; FeNO: fractional exhaled nitric oxide; 25-OH VitD: 25-hydroxyvitamin D. One-way ANOVA with post-hoc Tukey's multiple comparison tests were used.

**Table S2. Reference genes evaluated in this study.**

| Symbol        | TaqMan Assay ID | Protein name                             | Accession number | Amplicon length (bp) |
|---------------|-----------------|------------------------------------------|------------------|----------------------|
| <i>GUSB</i>   | Hs99999908_m1   | Glucuronidase beta                       | NM_000181        | 81                   |
| <i>B2M</i>    | Hs00187842_m1   | Beta-2-microglobulin                     | NM_004048        | 64                   |
| <i>POLR2A</i> | Hs00172187_m1   | RNA polymerase II subunit A              | NM_000937        | 61                   |
| <i>PPIA</i>   | Hs99999904_m1   | Peptidylprolyl isomerase A               | NM_001300981     | 98                   |
| <i>ACTB</i>   | Hs01060665_g1   | Actin beta                               | NM_001101        | 63                   |
| <i>GAPDH</i>  | Hs02758991_g1   | Glyceraldehyde-3-phosphate dehydrogenase | NM_001256799     | 93                   |
| <i>HPRT1</i>  | Hs02800695_m1   | Hypoxanthine phosphoribosyltransferase 1 | NM_000194        | 82                   |
| <i>TBP</i>    | Hs99999910_m1   | TATA-box binding protein                 | NM_003194        | 127                  |

**Table S3. Quantification cycle values in healthy, asthmatic, and obese asthmatic PBMCs.**

|               | Healthy      | Asthmatic    | Obese asthmatic | Kruskal-Wallis | Dunn's multiple comparisons test |         |         |
|---------------|--------------|--------------|-----------------|----------------|----------------------------------|---------|---------|
|               |              |              |                 | p value        | H vs A                           | H vs OA | A vs OA |
| <i>GUSB</i>   | 26.73 ± 0.58 | 27.88 ± 0.91 | 25.94 ± 0.99    | < 0.0001       | 0.0009                           | 0.0047  | <0.0001 |
| <i>B2M</i>    | 18.75 ± 0.67 | 20.51 ± 0.76 | 18.86 ± 0.80    | < 0.0001       | <0.0001                          | >0.9999 | <0.0001 |
| <i>POLR2A</i> | 26.26 ± 0.61 | 27.68 ± 0.79 | 25.42 ± 1.04    | < 0.0001       | 0.0010                           | 0.0005  | <0.0001 |
| <i>PPIA</i>   | 20.59 ± 0.82 | 23.44 ± 0.76 | 20.50 ± 0.96    | < 0.0001       | <0.0001                          | >0.9999 | <0.0001 |
| <i>ACTB</i>   | 21.11 ± 0.67 | 22.81 ± 1.03 | 20.80 ± 1.15    | < 0.0001       | <0.0001                          | 0.6067  | <0.0001 |
| <i>GAPDH</i>  | 22.55 ± 1.07 | 24.48 ± 1.02 | 21.73 ± 1.27    | < 0.0001       | 0.0005                           | 0.1015  | <0.0001 |
| <i>HPRT1</i>  | 28.75 ± 0.64 | 30.33 ± 1.00 | 28.07 ± 1.03    | < 0.0001       | 0.0003                           | 0.1538  | <0.0001 |
| <i>TBP</i>    | 28.26 ± 0.91 | 29.64 ± 0.90 | 27.68 ± 0.91    | < 0.0001       | 0.0008                           | 0.0390  | <0.0001 |

Data expressed as median ± SD. H: healthy subjects; A: asthmatic patients; OA: obese patients. Kruskal–Wallis with post hoc Dunn’s multiple comparison tests were used.
